# Supplementary material for: Effects of Caprylic Acid and Eicosapentaenoic Acid on Lipids, Inflammatory Levels, and the JAK2/STAT3 Pathway in ABCA1-Deficient Mice and ABCA1 Knock-Down RAW264.7 Cells
Source: MDPI journal article supplement (doi:10.3390/nu15051296), 2023-03-06
Supplement: s1 [file s1]

**Table S1.** Compositions of experimental diets (g/kg).

| <b>Ingredients</b>     | <b>C8:0 diet</b> | <b>C16:0 diet</b> | <b>EPA diet</b> | <b>HFD diet</b> |
|------------------------|------------------|-------------------|-----------------|-----------------|
| Corn starch            | 308.80           | 308.80            | 308.80          | 315.10          |
| Casein                 | 155.40           | 155.40            | 155.40          | 158.60          |
| L-Cystine              | 2.33             | 2.33              | 2.33            | 2.38            |
| Fiber(cellulose)       | 38.85            | 38.85             | 38.85           | 39.64           |
| Sucrose                | 77.70            | 77.70             | 77.70           | 79.29           |
| Maltose dextrin        | 102.60           | 102.60            | 102.60          | 104.69          |
| AIN mineral mix 93G    | 27.20            | 27.20             | 27.20           | 27.76           |
| AIN vitamin mix 93     | 7.77             | 7.77              | 7.77            | 7.93            |
| Choline bitartrate     | 1.94             | 1.94              | 1.94            | 1.98            |
| Soybean oil            | 54.39            | 54.39             | 54.39           | 55.50           |
| Tert-butylhydroquinone | 0.01             | 0.01              | 0.01            | 0.01            |
| Lard                   | 100.00           | 100.00            | 100.00          | 102.04          |
| Yolk powder            | 100.00           | 100.00            | 100.00          | 102.04          |
| Bile salt              | 3.00             | 3.00              | 3.00            | 3.06            |
| C8:0                   | 20.0             | 0.00              | 0.00            | 0.00            |
| C16:0                  | 0.00             | 20.0              | 0.00            | 0.00            |
| EPA                    | 0.00             | 0.00              | 20.00           | 0.00            |
| Energy (kJ/g)          | 18.44            | 18.44             | 18.44           | 18.05           |
| Protein                | 18.01            | 18.01             | 18.01           | 18.38           |
| Fat                    | 19.42            | 19.42             | 19.42           | 17.78           |
| Carbohydrate           | 48.47            | 48.47             | 48.47           | 49.46           |
| Cholesterol            | 0.029            | 0.029             | 0.029           | 0.030           |
| Mineral mixture        | 0.078            | 0.078             | 0.078           | 0.080           |
| Vitamin mixture        | 0.052            | 0.052             | 0.052           | 0.053           |
| Fiber                  | 0.150            | 0.150             | 0.150           | 0.153           |
| Water                  | 0.950            | 0.950             | 0.950           | 0.969           |
| Others                 | 0.106            | 0.106             | 0.106           | 0.108           |

C8:0, caprylic acid; C16:0, palmitic acid; EPA, eicosapentaenoic acid; HFD, high-fat diet.

**Table S2.** Fatty acid compositions of the experimental diets (g/kg).

| <b>Ingredients</b> | <b>C8:0 diet</b> | <b>C16:0 diet</b> | <b>EPA diet</b> | <b>HFD diet</b> |
|--------------------|------------------|-------------------|-----------------|-----------------|
| C8:0               | 20.45            | ND                | ND              | ND              |
| C14:0              | 1.84             | 1.84              | 1.84            | 1.88            |
| C16:0              | 43.36            | 63.36             | 43.36           | 44.24           |
| C16:1              | 3.78             | 3.78              | 3.78            | 3.86            |
| C18:0              | 21.88            | 21.88             | 21.88           | 22.33           |
| C18:1              | 64.02            | 64.02             | 64.02           | 65.33           |
| C18:2              | 34.87            | 34.87             | 34.87           | 35.58           |
| C18:3              | 1.94             | 1.94              | 1.94            | 1.98            |
| C20:0              | 0.41             | 0.41              | 0.41            | 0.42            |
| C20:5              | 0.82             | 0.82              | 20.82           | 0.84            |
| C22:0              | 0.31             | 0.31              | 0.31            | 0.32            |

| C22:6                                                                                                                                                                                                                                                                                                                                  | 0.51 | 0.51 | 0.51 | 0.52 |
|----------------------------------------------------------------------------------------------------------------------------------------------------------------------------------------------------------------------------------------------------------------------------------------------------------------------------------------|------|------|------|------|
| C8:0, caprylic acid; C14:0, myristic acid; C16:0, palmitic acid; C16:1, palmitoleic acid; C18:0, stearic acid; C18:1, oleic acid; C18:2, linoleic acid; C18:3, linolenic acid; C20:0, arachidic acid; C20:5, eicosapentaenoic acid, EPA; C22:0, behenic acid; C22:6, docosahexenoic acid, DHA; HFD, high-fat diet; ND, not detectable. |      |      |      |      |

**Table S3.** qRT-PCR Primer sequences in plasmid siRNA of ABCA1.

| Gene       | Sense primer (5'-3')  | Antisense primer (5'-3') |
|------------|-----------------------|--------------------------|
| NC         | UUCUCCGAACGUGUCACGUTT | ACGUGACACGUUCGGAGAATT    |
| ABCA1-1530 | GGAGUUGGCUGUGUCCAUTT  | AUGGAACACAGCCAACUCCTT    |
| ABCA1-1701 | CCAAGACAUCAUGGCGUUUTT | AAACGCCAUGAUGUCUUGGTT    |
| ABCA1-4931 | GGGUGUCAGUAAUUCUCAATT | UUGAGAAUUACUGACACCCTT    |

NC, normal control; ABCA1, ATP binding box transporter A1.
